# Supplementary material
Source: PubMed Central journal article supplement (PMC8216213)
Supplement: NIHMS1706748-supplement-1706748_Supp_Tab1-7_Supp_Fig1-3.pdf [file NIHMS1706748-supplement-1706748_Supp_Tab1-7_Supp_Fig1-3.pdf]

## Supplementary Figures:

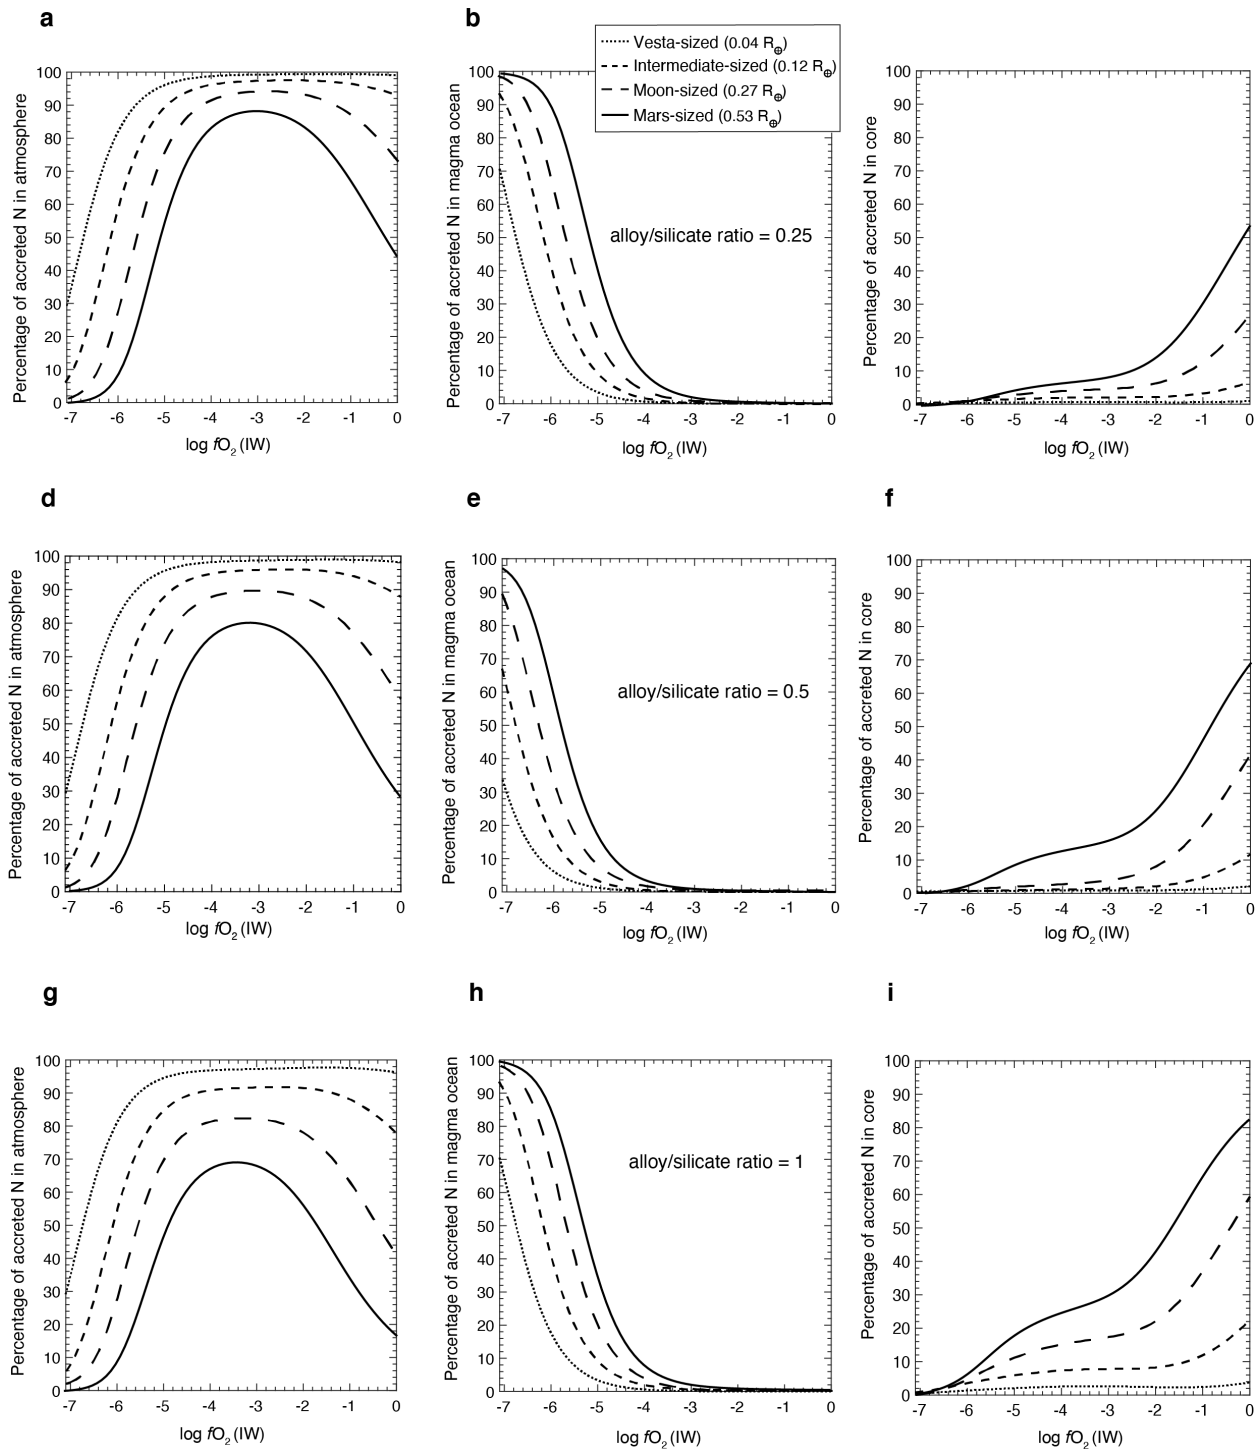

**Supplementary Figure 1: Sensitivity analysis of the relative distribution of nitrogen in the atmosphere, magma ocean, and core with variation in alloy/silicate ratio (= 0.25: a), b), and**

**c); = 0.5: d), e), and f); = 1: g), h), and i)).** This figure shows that the results of Fig. 3 (panels **d), e) and f)** in this figure) hold true independent of the variation of the core/mantle ratio or the efficiency of alloy-silicate equilibration. A bulk accreted N of 500 ppm and alloys containing 0.4 wt.% C are used for these calculations.

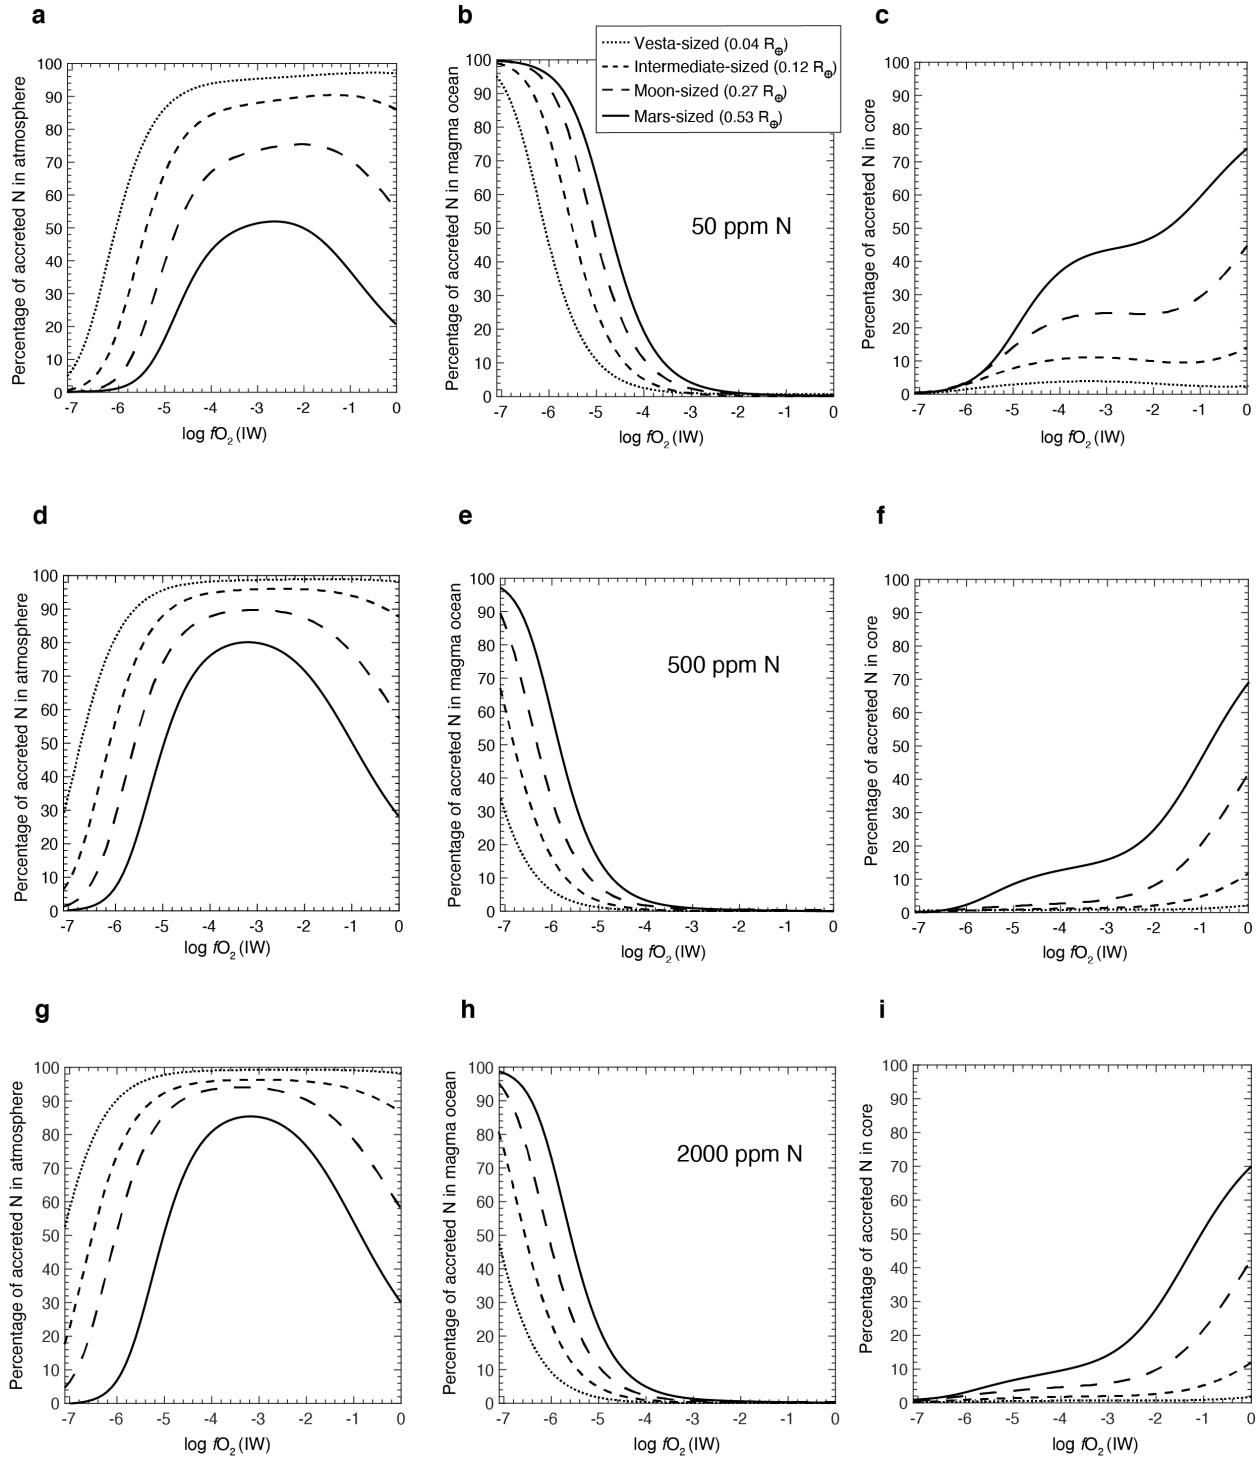

**Supplementary Figure 2: Sensitivity analysis of the relative distribution of nitrogen in the atmosphere, magma ocean, and core with variation in initial abundances of accreted N (= 50 ppm: a), b), and c); = 500 ppm: d), e), and f); = 2000 ppm: g), h), and i)). This figure**

shows that the results of Fig. 3 (panels **d**), **e**) and **f**) in this figure) hold true independent of the variation of initial amount of N that was accreted. An alloy/silicate ratio of 0.5 and alloys containing 0.4 wt.% C are used for these calculations.

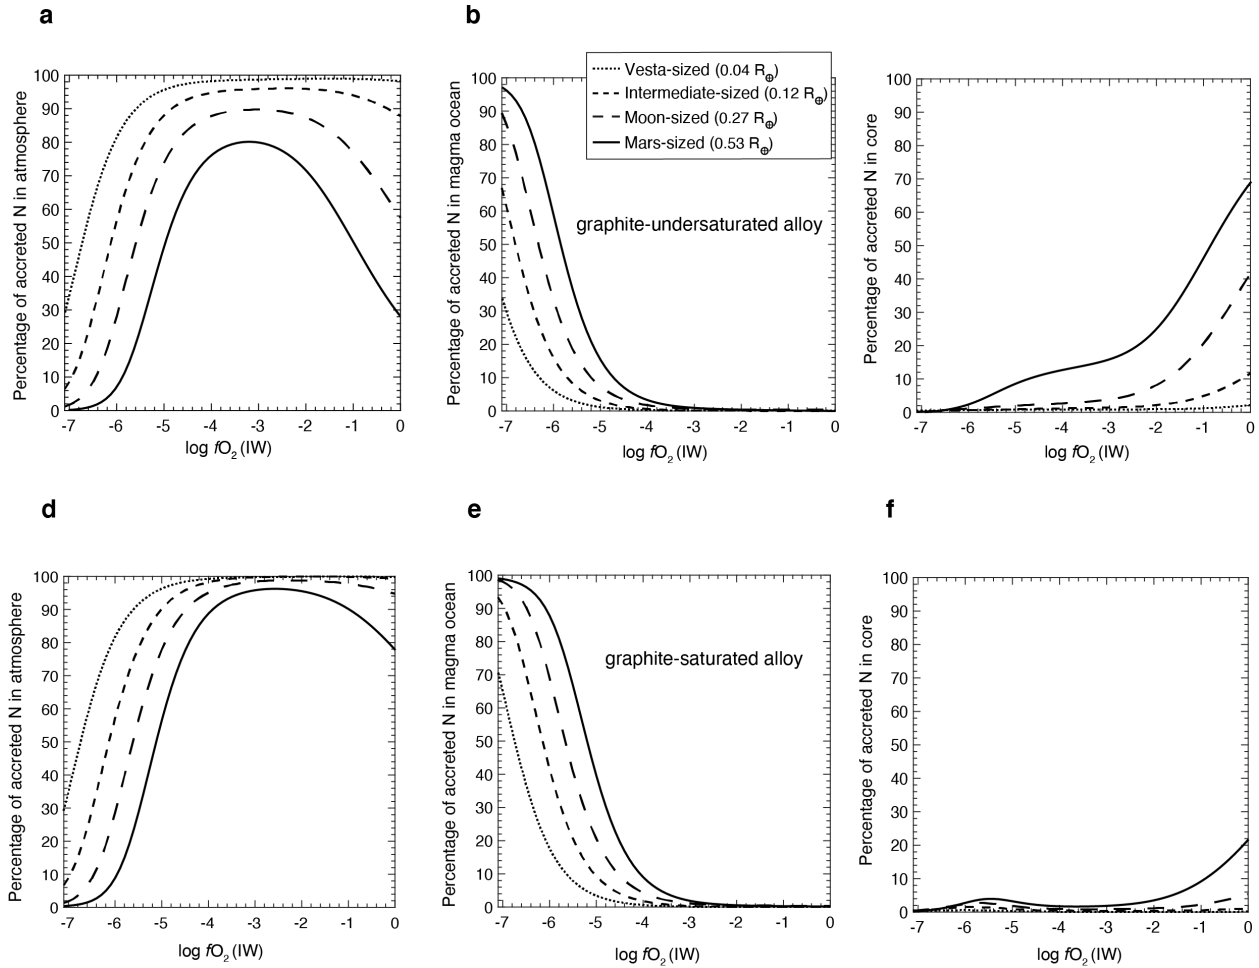

**Supplementary Figure 3: Comparison of the relative distribution of nitrogen in the**

**atmosphere, magma ocean, and core for graphite-undersaturated and graphite-saturated**

**alloys.** Determining  $D_N^{\text{alloy/silicate}}$  in C-undersaturated alloys (**a**), **b**) and **c**) was critical for the

conclusions drawn in this study as for C-saturated alloys (**d**), **e**) and **f**) there would be minimal segregation of N into the core of even larger planetary embryos, which would mean that for core-

mantle differentiation at  $\log fO_2 > IW-4$ , N degassing into the atmosphere would be the primary

cause of N depletion in magma oceans of rocky bodies irrespective of their sizes. For

calculations involving C-undersaturated alloys, C content of the alloy was fixed at 0.4 wt.%. A

bulk accreted N of 500 ppm and an alloy/silicate ratio of 0.5 is used for these calculations.

**Supplementary Table 1. Chemical compositions of starting materials (in wt.%)**

| <b>Silicate Mix</b> | <b>SiO<sub>2</sub></b> | <b>Al<sub>2</sub>O<sub>3</sub></b> | <b>Cr<sub>2</sub>O<sub>3</sub></b> | <b>FeO</b> | <b>MnO</b> | <b>MgO</b> | <b>CaO</b> | <b>Na<sub>2</sub>O</b> | <b>K<sub>2</sub>O</b> | <b>Sum</b> | <b>NBO/T</b> |
|---------------------|------------------------|------------------------------------|------------------------------------|------------|------------|------------|------------|------------------------|-----------------------|------------|--------------|
| <b>ThB1</b>         | 51.19                  | 16.12                              | 0.03                               | 9.18       | 0.23       | 8.75       | 11.35      | 3.05                   | 0.10                  | 100.00     | 0.76         |

| <b>Alloy mix</b>        | <b>Fe</b> | <b>Ni</b> | <b>N</b> | <b>Si</b> | <b>Sum</b> |
|-------------------------|-----------|-----------|----------|-----------|------------|
| <b>Fe-5Ni-5N-0Si</b>    | 90        | 5         | 5        | 0         | 100        |
| <b>Fe-5Ni-5N-7.5Si</b>  | 82.5      | 5         | 5        | 7.5       | 100        |
| <b>Fe-5Ni-5N-12.5Si</b> | 77.5      | 5         | 5        | 12.5      | 100        |
| <b>Fe-5Ni-5N-17.5Si</b> | 72.5      | 5         | 5        | 17.5      | 100        |
| <b>Fe-5Ni-5N-22.5Si</b> | 67.5      | 5         | 5        | 22.5      | 100        |
| <b>Fe-5Ni-5N-27.5Si</b> | 62.5      | 5         | 5        | 27.5      | 100        |
| <b>Fe-5Ni-5N-32.5Si</b> | 57.5      | 5         | 5        | 32.5      | 100        |
| <b>Fe-5Ni-5N-37.5Si</b> | 52.5      | 5         | 5        | 37.5      | 100        |

**Supplementary Table 2. Summary of experimental conditions, quench products, oxygen fugacity, and alloy-silicate partitioning coefficient of nitrogen (N)**

| Exp Samples | <i>P</i> (GPa) | <i>T</i> (°C) | *Duration |  | Capsule | <sup>b</sup> Starting composition | Quench Products                | <sup>c</sup> log <i>f</i> O <sub>2</sub> (ΔIW) |           | <sup>d</sup> log <i>f</i> O <sub>2</sub> (ΔIW) | <i>D</i> <sub>N</sub> <sup>alloy/silicate</sup> | <sup>e</sup> 1-σ |
|-------------|----------------|---------------|-----------|--|---------|-----------------------------------|--------------------------------|------------------------------------------------|-----------|------------------------------------------------|-------------------------------------------------|------------------|
|             |                |               | (h)       |  |         |                                   |                                | Ideal                                          | Non-ideal |                                                |                                                 |                  |
| G604        | 3              | 1800          | 0.75      |  | MgO     | 70%ThB1+30%Fe-5Ni-5N-37.5Si       | Periclase+Glass+Alloy          | -8.27                                          | -7.10     | 0.01                                           | 0.00                                            |                  |
| G605        | 3              | 1700          | 1         |  | MgO     | 70%ThB1+30%Fe-5Ni-5N-37.5Si       | Periclase+Glass+Alloy          | -8.30                                          | -7.06     | 0.01                                           | 0.00                                            |                  |
| G606        | 3              | 1600          | 3         |  | MgO     | 70%ThB1+30%Fe-5Ni-5N-37.5Si       | Periclase+Glass+Alloy          | -8.10                                          | -6.92     | 0.01                                           | 0.00                                            |                  |
| G607        | 3              | 1800          | 1         |  | MgO     | 70%ThB1+30%Fe-5Ni-5N-32.5Si       | Periclase+Glass+Alloy          | -6.68                                          | -5.83     | 0.02                                           | 0.01                                            |                  |
| G608        | 3              | 1700          | 1.5       |  | MgO     | 70%ThB1+30%Fe-5Ni-5N-32.5Si       | Periclase+Olivine+Glass+Alloy  | -6.62                                          | -5.72     | 0.02                                           | 0.00                                            |                  |
| G609        | 3              | 1600          | 2         |  | MgO     | 70%ThB1+30%Fe-5Ni-5N-32.5Si       | Periclase+Glass+Alloy          | -6.65                                          | -5.59     | 0.02                                           | 0.01                                            |                  |
| G610        | 3              | 1800          | 0.75      |  | MgO     | 70%ThB1+30%Fe-5Ni-5N-27.5Si       | Periclase+Olivine+Glass+Alloy  | -5.41                                          | -4.87     | 0.07                                           | 0.04                                            |                  |
| B466        | 3              | 1600          | 2         |  | MgO     | 70%ThB1+30%Fe-5Ni-5N-27.5Si       | Periclase+Glass+Alloy          | -5.42                                          | -4.82     | 0.09                                           | 0.04                                            |                  |
| G613        | 3              | 1800          | 2         |  | MgO     | 70%ThB1+30%Fe-5Ni-5N-22.5Si       | Periclase+Glass+Alloy          | -4.69                                          | -4.26     | 0.27                                           | 0.03                                            |                  |
| G614        | 3              | 1700          | 2         |  | MgO     | 70%ThB1+30%Fe-5Ni-5N-22.5Si       | Periclase+Glass+Alloy          | -4.66                                          | -4.23     | 0.42                                           | 0.07                                            |                  |
| B467        | 3              | 1600          | 1.5       |  | MgO     | 70%ThB1+30%Fe-5Ni-5N-22.5Si       | Periclase+Glass+Alloy          | -4.55                                          | -4.11     | 0.30                                           | 0.04                                            |                  |
| X43         | 3              | 1800          | 1         |  | MgO     | 70%ThB1+30%Fe-5Ni-5N-17.5Si       | Periclase+Olivine+Glass+Alloy  | -4.60                                          | -4.22     | 1.24                                           | 0.18                                            |                  |
| X39         | 3              | 1700          | 2         |  | MgO     | 70%ThB1+30%Fe-5Ni-5N-17.5Si       | Periclase+Dendrite+Glass+Alloy | -4.98                                          | -4.60     | 1.41                                           | 0.21                                            |                  |
| X63         | 3              | 1600          | 0.5       |  | MgO     | 70%ThB1+30%Fe-5Ni-5N-17.5Si       | Periclase+Dendrite+Glass+Alloy | -4.68                                          | -4.37     | 1.28                                           | 0.08                                            |                  |
| G634        | 3              | 1600          | 2         |  | MgO     | 70%ThB1+30%Fe-5Ni-5N-17.5Si       | Periclase+Dendrite+Glass+Alloy | -4.42                                          | -4.12     | 1.44                                           | 0.08                                            |                  |
| X74         | 3              | 1600          | 6         |  | MgO     | 70%ThB1+30%Fe-5Ni-5N-17.5Si       | Periclase+Dendrite+Glass+Alloy | -4.64                                          | -4.31     | 1.45                                           | 0.09                                            |                  |
| G639        | 3              | 1600          | 12        |  | MgO     | 70%ThB1+30%Fe-5Ni-5N-17.5Si       | Periclase+Dendrite+Glass+Alloy | -4.72                                          | -4.42     | 1.53                                           | 0.08                                            |                  |
| G603        | 3              | 1800          | 1.5       |  | MgO     | 70%ThB1+30%Fe-5Ni-5N-12.5Si       | Periclase+Dendrite+Glass+Alloy | -4.54                                          | -4.17     | 3.12                                           | 0.17                                            |                  |
| X29         | 3              | 1700          | 2         |  | MgO     | 70%ThB1+30%Fe-5Ni-5N-12.5Si       | Periclase+Dendrite+Glass+Alloy | -4.38                                          | -4.01     | 3.22                                           | 0.28                                            |                  |
| X25         | 3              | 1600          | 3         |  | MgO     | 70%ThB1+30%Fe-5Ni-5N-12.5Si       | Periclase+Dendrite+Glass+Alloy | -3.88                                          | -3.51     | 4.44                                           | 0.89                                            |                  |
| G620        | 3              | 1800          | 1.5       |  | MgO     | 70%ThB1+30%Fe-5Ni-5N-7.5Si        | Periclase+Dendrite+Glass+Alloy | -2.66                                          | -2.27     | 26.41                                          | 7.88                                            |                  |
| X50         | 3              | 1700          | 1.5       |  | MgO     | 70%ThB1+30%Fe-5Ni-5N-7.5Si        | Periclase+Dendrite+Glass+Alloy | -2.98                                          | -2.60     | 20.53                                          | 4.34                                            |                  |
| G621        | 3              | 1600          | 2         |  | MgO     | 70%ThB1+30%Fe-5Ni-5N-7.5Si        | Periclase+Dendrite+Glass+Alloy | -2.78                                          | -2.43     | 24.55                                          | 6.55                                            |                  |
| X47         | 3              | 1800          | 0.75      |  | MgO     | 70%ThB1+30%Fe-5Ni-5N-0Si          | Periclase+Dendrite+Glass+Alloy | -1.91                                          | -1.54     | 93.68                                          | 30.98                                           |                  |
| G623        | 3              | 1700          | 1         |  | MgO     | 70%ThB1+30%Fe-5Ni-5N-0Si          | Periclase+Dendrite+Glass+Alloy | -2.11                                          | -1.63     | 93.48                                          | 32.92                                           |                  |
| X48         | 3              | 1600          | 3         |  | MgO     | 70%ThB1+30%Fe-5Ni-5N-0Si          | Periclase+Dendrite+Glass+Alloy | -2.32                                          | -1.96     | 116.50                                         | 38.90                                           |                  |

<sup>a</sup>The experiments were held at 850-900 °C for 2–12 h before raising to the target temperature in order to reduce the porosity of MgO capsules and prevent the leakage of silicate melt and alloy melt

<sup>b</sup>For details see Table S1

<sup>c</sup> $fO_2$  with respect to iron-wüstite buffer (IW) calculated using ideal solution model for both alloy and silicate melts

<sup>d</sup> $fO_2$  with respect to iron-wüstite buffer (IW) calculated using non-ideal solution model for both alloy and silicate melts (see text for details)

$fO_2$  calculations are made using the average FeO\* and Fe contents of silicate melts and alloys, respectively

<sup>e</sup>1- $\sigma$  error for  $D_N^{\text{alloy/silicate}}$  is obtained by propagating 1- $\sigma$  deviation error on N content in the alloy and silicate melt

Matte = Silicate melt domain that quenched to an aggregate of dendritic crystals



**Supplementary Table 3. The major element compositions (in wt.%) of the silicate melts**

| Exp Samples | <i>n</i> | SiO <sub>2</sub> | SiO <sub>2</sub> -corr | Al <sub>2</sub> O <sub>3</sub> | Cr <sub>2</sub> O <sub>3</sub> | FeO  | MnO  | MgO   | CaO   | Na <sub>2</sub> O | K <sub>2</sub> O | BaO  | N    | Total  | Total-corr | <sup>a</sup> NBO/T | <sup>b</sup> SiO/SiO <sub>2</sub> -corr |
|-------------|----------|------------------|------------------------|--------------------------------|--------------------------------|------|------|-------|-------|-------------------|------------------|------|------|--------|------------|--------------------|-----------------------------------------|
| G604        | 20       | 48.88            | 46.44                  | 14.96                          | 0.00                           | 0.01 | 0.03 | 24.80 | 12.62 | 2.57              | 0.09             | 1.34 | 1.42 | 106.72 | 104.28     | 1.38               | 0.44                                    |
| 1-σ         |          | 0.37             | 0.37                   | 0.14                           | 0.00                           | 0.01 | 0.01 | 0.63  | 0.24  | 0.06              | 0.01             | 0.04 | 0.08 | 0.19   | 0.19       | 0.01               |                                         |
| G605        | 20       | 49.65            | 46.36                  | 16.15                          | 0.00                           | 0.01 | 0.02 | 25.53 | 11.64 | 2.29              | 0.08             | 0.51 | 1.92 | 107.80 | 104.51     | 1.34               | 0.48                                    |
| 1-σ         |          | 0.17             | 0.17                   | 0.15                           | 0.00                           | 0.01 | 0.01 | 0.25  | 0.13  | 0.04              | 0.01             | 0.04 | 0.13 | 0.35   | 0.35       | 0.00               |                                         |
| G606        | 19       | 48.76            | 45.70                  | 16.76                          | 0.00                           | 0.01 | 0.05 | 25.93 | 11.41 | 2.39              | 0.11             | 0.46 | 1.79 | 107.67 | 104.60     | 1.34               | 0.51                                    |
| 1-σ         |          | 0.15             | 0.15                   | 0.09                           | 0.01                           | 0.03 | 0.01 | 0.11  | 0.09  | 0.04              | 0.00             | 0.06 | 0.06 | 0.29   | 0.29       | 0.01               |                                         |
| G607        | 20       | 45.39            | 42.98                  | 13.55                          | 0.01                           | 0.04 | 0.05 | 29.63 | 11.22 | 2.28              | 0.08             | 2.30 | 1.41 | 105.96 | 103.54     | 1.73               | 0.37                                    |
| 1-σ         |          | 0.18             | 0.18                   | 0.06                           | 0.01                           | 0.01 | 0.01 | 0.11  | 0.15  | 0.02              | 0.00             | 0.06 | 0.18 | 0.30   | 0.30       | 0.01               |                                         |
| G608        | 20       | 51.89            | 49.53                  | 13.91                          | 0.01                           | 0.04 | 0.09 | 25.40 | 10.47 | 1.98              | 0.08             | 0.78 | 1.37 | 106.01 | 103.65     | 1.28               | 0.31                                    |
| 1-σ         |          | 0.37             | 0.37                   | 0.11                           | 0.00                           | 0.01 | 0.02 | 0.19  | 0.05  | 0.03              | 0.01             | 0.16 | 0.03 | 0.32   | 0.32       | 0.01               |                                         |
| G609        | 18       | 49.11            | 46.32                  | 16.42                          | 0.01                           | 0.04 | 0.11 | 24.79 | 10.72 | 2.62              | 0.10             | 0.86 | 1.63 | 106.41 | 103.63     | 1.46               | 0.34                                    |
| 1-σ         |          | 0.37             | 0.37                   | 0.12                           | 0.01                           | 0.01 | 0.00 | 0.22  | 0.05  | 0.06              | 0.01             | 0.30 | 0.08 | 0.13   | 0.13       | 0.01               |                                         |
| G610        | 20       | 50.95            | 49.08                  | 13.87                          | 0.01                           | 0.21 | 0.15 | 26.03 | 10.61 | 2.02              | 0.08             | 0.15 | 1.09 | 105.14 | 103.27     | 1.32               | 0.27                                    |
| 1-σ         |          | 0.25             | 0.25                   | 0.15                           | 0.01                           | 0.05 | 0.01 | 0.12  | 0.06  | 0.04              | 0.01             | 0.02 | 0.03 | 0.19   | 0.19       | 0.01               |                                         |
| B466        | 20       | 49.45            | 47.29                  | 15.26                          | 0.01                           | 0.19 | 0.15 | 23.00 | 12.56 | 2.79              | 0.10             | 1.07 | 1.26 | 105.84 | 103.69     | 1.27               | 0.34                                    |
| 1-σ         |          | 0.39             | 0.39                   | 0.48                           | 0.01                           | 0.02 | 0.01 | 0.13  | 0.07  | 0.10              | 0.01             | 0.25 | 0.07 | 0.19   | 0.19       | 0.01               |                                         |
| G613        | 20       | 49.49            | 47.65                  | 17.05                          | 0.01                           | 0.47 | 0.21 | 23.22 | 11.03 | 2.62              | 0.11             | 0.03 | 1.07 | 105.30 | 103.46     | 1.15               | 0.31                                    |
| 1-σ         |          | 0.06             | 0.06                   | 0.08                           | 0.01                           | 0.01 | 0.01 | 0.06  | 0.05  | 0.03              | 0.01             | 0.02 | 0.11 | 0.03   | 0.03       | 0.00               |                                         |
| G614        | 20       | 48.34            | 46.85                  | 14.66                          | 0.00                           | 0.49 | 0.17 | 21.30 | 11.46 | 2.27              | 0.09             | 4.75 | 0.87 | 104.40 | 102.92     | 1.31               | 0.25                                    |
| 1-σ         |          | 0.27             | 0.27                   | 0.05                           | 0.00                           | 0.02 | 0.02 | 0.20  | 0.08  | 0.02              | 0.01             | 0.09 | 0.06 | 0.14   | 0.14       | 0.01               |                                         |
| B467        | 20       | 50.23            | 48.55                  | 14.33                          | 0.00                           | 0.58 | 0.17 | 24.07 | 10.85 | 1.97              | 0.08             | 0.96 | 0.98 | 104.22 | 102.54     | 1.27               | 0.20                                    |
| 1-σ         |          | 0.64             | 0.64                   | 0.10                           | 0.01                           | 0.02 | 0.02 | 0.33  | 0.14  | 0.06              | 0.01             | 0.04 | 0.05 | 0.89   | 0.89       | 0.02               |                                         |
| X43         | 20       | 43.11            | 41.53                  | 14.84                          | 0.01                           | 0.59 | 0.15 | 28.36 | 11.42 | 2.06              | 0.05             | 2.69 | 0.92 | 104.22 | 102.63     | 1.70               | 0.25                                    |
| 1-σ         |          | 0.42             | 0.42                   | 0.22                           | 0.01                           | 0.03 | 0.01 | 0.98  | 0.37  | 0.09              | 0.01             | 0.19 | 0.10 | 0.30   | 0.30       | 0.01               |                                         |
| X39         | 17       | 47.70            | 46.37                  | 15.86                          | 0.01                           | 0.36 | 0.18 | 19.86 | 12.78 | 2.76              | 0.11             | 3.88 | 0.78 | 104.29 | 102.96     | 1.74               | 0.26                                    |
| 1-σ         |          | 0.37             | 0.37                   | 0.15                           | 0.01                           | 0.02 | 0.02 | 0.28  | 0.09  | 0.07              | 0.00             | 0.22 | 0.11 | 0.46   | 0.46       | 0.01               |                                         |
| X63         | 10       | 47.39            | 44.52                  | 16.53                          | 0.01                           | 0.56 | 0.17 | 25.71 | 10.73 | 2.36              | 0.10             | 0.18 | 0.91 | 104.53 | 101.67     | 1.29               | 0.25                                    |
| 1-σ         |          | 0.20             | 0.20                   | 0.18                           | 0.01                           | 0.02 | 0.01 | 0.32  | 0.08  | 0.01              | 0.01             | 0.05 | 0.11 | 0.32   | 0.32       | 0.01               |                                         |
| G634        | 10       | 46.78            | 44.61                  | 17.86                          | 0.01                           | 0.72 | 0.21 | 24.13 | 10.12 | 3.93              | 0.15             | 0.07 | 0.85 | 104.73 | 102.56     | 1.21               | 0.24                                    |
| 1-σ         |          | 0.17             | 0.17                   | 0.13                           | 0.01                           | 0.11 | 0.01 | 0.12  | 0.06  | 0.00              | 0.04             | 0.01 | 0.10 | 0.21   | 0.21       | 0.01               |                                         |
| X74         | 10       | 46.35            | 43.84                  | 16.07                          | 0.00                           | 0.55 | 0.18 | 21.08 | 11.88 | 3.11              | 0.08             | 2.48 | 0.94 | 102.63 | 100.12     | 1.25               | 0.20                                    |
| 1-σ         |          | 0.45             | 0.45                   | 0.62                           | 0.01                           | 0.02 | 0.01 | 0.52  | 0.09  | 0.00              | 0.01             | 0.10 | 0.10 | 0.40   | 0.40       | 0.00               |                                         |
| G639        | 10       | 45.94            | 42.91                  | 16.03                          | 0.01                           | 0.51 | 0.17 | 23.80 | 10.54 | 3.57              | 0.09             | 1.08 | 0.82 | 102.45 | 99.42      | 1.31               | 0.19                                    |
| 1-σ         |          | 0.41             | 0.41                   | 0.25                           | 0.01                           | 0.07 | 0.01 | 0.33  | 0.16  | 0.01              | 0.01             | 0.06 | 0.10 | 0.35   | 0.35       | 0.02               |                                         |
| G603        | 20       | 43.06            | 41.80                  | 15.08                          | 0.00                           | 0.59 | 0.16 | 24.24 | 12.94 | 2.51              | 0.09             | 3.87 | 0.73 | 103.27 | 102.01     | 1.62               | 0.18                                    |
| 1-σ         |          | 0.18             | 0.18                   | 0.18                           | 0.00                           | 0.02 | 0.01 | 0.51  | 0.22  | 0.04              | 0.01             | 0.14 | 0.01 | 0.39   | 0.39       | 0.02               |                                         |
| X29         | 20       | 46.24            | 45.14                  | 14.63                          | 0.00                           | 0.73 | 0.17 | 25.46 | 11.25 | 2.15              | 0.08             | 2.41 | 0.64 | 103.77 | 102.67     | 1.48               | 0.23                                    |
| 1-σ         |          | 0.16             | 0.16                   | 0.11                           | 0.00                           | 0.03 | 0.01 | 0.24  | 0.13  | 0.04              | 0.01             | 0.09 | 0.03 | 0.32   | 0.32       | 0.01               |                                         |
| X25         | 20       | 44.96            | 44.23                  | 14.79                          | 0.01                           | 1.14 | 0.14 | 26.09 | 8.03  | 1.76              | 0.08             | 5.43 | 0.42 | 102.90 | 102.17     | 1.51               | 0.18                                    |

|             |    |       |       |       |      |      |      |       |       |      |      |      |      |        |        |      |      |
|-------------|----|-------|-------|-------|------|------|------|-------|-------|------|------|------|------|--------|--------|------|------|
| 1- $\sigma$ |    | 0.55  | 0.55  | 0.16  | 0.01 | 0.06 | 0.01 | 0.26  | 0.11  | 0.06 | 0.01 | 0.22 | 0.08 | 0.19   | 0.19   | 0.02 |      |
| G620        | 20 | 42.47 | 42.28 | 12.68 | 0.01 | 4.55 | 0.19 | 20.34 | 14.54 | 2.57 | 0.12 | 3.75 | 0.11 | 101.34 | 101.15 | 1.83 | n.a. |
| 1- $\sigma$ |    | 1.15  | 1.15  | 0.80  | 0.01 | 0.40 | 0.01 | 4.46  | 1.56  | 0.22 | 0.01 | 3.32 | 0.03 | 0.50   | 0.50   | 0.01 |      |
| X50         | 20 | 43.28 | 43.04 | 14.84 | 0.01 | 3.40 | 0.19 | 20.97 | 14.41 | 2.63 | 0.08 | 1.75 | 0.14 | 101.69 | 101.45 | 1.49 | n.a. |
| 1- $\sigma$ |    | 0.06  | 0.06  | 0.35  | 0.00 | 0.03 | 0.02 | 1.10  | 0.62  | 0.16 | 0.01 | 0.11 | 0.03 | 0.14   | 0.14   | 0.01 |      |
| G621        | 16 | 44.82 | 44.64 | 15.63 | 0.01 | 4.06 | 0.19 | 19.65 | 11.70 | 2.36 | 0.10 | 2.72 | 0.10 | 101.34 | 101.16 | 1.31 | n.a. |
| 1- $\sigma$ |    | 0.23  | 0.23  | 0.05  | 0.01 | 0.06 | 0.02 | 0.26  | 0.09  | 0.08 | 0.00 | 0.12 | 0.03 | 0.16   | 0.16   | 0.01 |      |
| X47         | 20 | 41.55 | 41.48 | 16.50 | 0.01 | 9.86 | 0.17 | 14.67 | 11.62 | 2.63 | 0.24 | 1.35 | 0.04 | 98.65  | 98.58  | 1.41 | n.a. |
| 1- $\sigma$ |    | 1.19  | 1.19  | 1.66  | 0.01 | 1.23 | 0.01 | 1.34  | 1.51  | 0.88 | 0.03 | 0.52 | 0.01 | 0.87   | 0.87   | 0.01 |      |
| G623        | 20 | 42.96 | 42.90 | 14.59 | 0.01 | 8.20 | 0.17 | 19.13 | 15.09 | 1.05 | 0.09 | 0.32 | 0.03 | 101.65 | 101.59 | 1.48 | n.a. |
| 1- $\sigma$ |    | 0.49  | 0.49  | 0.34  | 0.01 | 0.74 | 0.02 | 0.93  | 0.68  | 0.16 | 0.05 | 0.16 | 0.01 | 0.73   | 0.73   | 0.01 |      |
| X48         | 20 | 43.99 | 43.93 | 13.04 | 0.00 | 6.83 | 0.18 | 16.69 | 14.66 | 2.87 | 0.10 | 0.33 | 0.03 | 98.72  | 98.67  | 1.41 | n.a. |
| 1- $\sigma$ |    | 0.27  | 0.27  | 0.12  | 0.00 | 0.03 | 0.01 | 0.20  | 0.02  | 0.13 | 0.01 | 0.05 | 0.01 | 0.07   | 0.07   | 0.01 |      |

<sup>a</sup>NBO/T = (2×Total O)/T - 4, where T = Si + Ti + Al + Cr + P

NBO/T calculations are made using the average oxide composition of silicate melts. 1- $\sigma$  standard deviations are based on replicate EPMA analyses.

*n* represents the number of obtained measurements that were averaged for the reported data

<sup>b</sup>SiO/SiO<sub>2</sub>-corr = possible ratio of SiO to SiO<sub>2</sub>-corr to obtain a total of 100

n.a. = not applicable

**Supplementary Table 4: Major element compositions (in wt.%) of the alloy melts**

| Exp Samples | <i>n</i> | Fe    | Ni   | Si    | N     | C    | O    | Total  |
|-------------|----------|-------|------|-------|-------|------|------|--------|
| G604        | 20       | 71.32 | 5.15 | 23.78 | 0.010 | 0.28 | 0.30 | 100.85 |
| 1- $\sigma$ |          | 0.37  | 0.54 | 0.21  | 0.005 | 0.04 | 0.06 | 0.21   |
| G605        | 20       | 70.41 | 5.16 | 24.05 | 0.011 | 0.38 | 0.29 | 100.29 |
| 1- $\sigma$ |          | 0.56  | 0.18 | 0.04  | 0.007 | 0.08 | 0.03 | 0.56   |
| G606        | 20       | 69.76 | 5.06 | 24.60 | 0.013 | 0.22 | 0.26 | 99.94  |
| 1- $\sigma$ |          | 0.38  | 0.20 | 0.26  | 0.006 | 0.03 | 0.05 | 0.49   |
| G607        | 20       | 77.18 | 4.93 | 17.46 | 0.031 | 0.59 | 0.33 | 100.52 |
| 1- $\sigma$ |          | 0.38  | 0.07 | 0.14  | 0.006 | 0.11 | 0.03 | 0.35   |
| G608        | 16       | 73.77 | 4.55 | 21.22 | 0.032 | 0.18 | 0.25 | 100.00 |
| 1- $\sigma$ |          | 0.47  | 0.08 | 0.11  | 0.004 | 0.02 | 0.03 | 0.37   |
| G609        | 20       | 75.05 | 4.64 | 21.29 | 0.038 | 0.14 | 0.22 | 101.38 |
| 1- $\sigma$ |          | 0.15  | 0.05 | 0.11  | 0.013 | 0.06 | 0.07 | 0.14   |
| G610        | 20       | 83.93 | 4.74 | 10.19 | 0.081 | 0.14 | 0.35 | 99.44  |
| 1- $\sigma$ |          | 0.64  | 0.08 | 0.17  | 0.046 | 0.05 | 0.09 | 0.73   |
| B466        | 20       | 84.16 | 4.78 | 10.12 | 0.117 | 0.58 | 0.63 | 100.39 |
| 1- $\sigma$ |          | 0.43  | 0.07 | 0.19  | 0.046 | 0.08 | 0.05 | 0.46   |
| G613        | 20       | 86.59 | 5.18 | 5.68  | 0.293 | 0.17 | 0.34 | 98.25  |
| 1- $\sigma$ |          | 0.58  | 0.08 | 0.05  | 0.015 | 0.03 | 0.04 | 0.61   |
| G614        | 20       | 86.33 | 5.41 | 5.36  | 0.365 | 0.41 | 0.51 | 98.37  |
| 1- $\sigma$ |          | 0.67  | 0.07 | 0.25  | 0.054 | 0.05 | 0.08 | 0.34   |
| B467        | 20       | 87.57 | 5.22 | 5.72  | 0.292 | 0.41 | 0.55 | 99.76  |
| 1- $\sigma$ |          | 0.63  | 0.14 | 0.14  | 0.035 | 0.03 | 0.03 | 0.61   |
| X43         | 20       | 90.12 | 5.17 | 1.61  | 1.142 | 0.34 | 0.11 | 98.50  |
| 1- $\sigma$ |          | 0.59  | 0.08 | 0.18  | 0.111 | 0.02 | 0.02 | 0.44   |
| X39         | 20       | 90.71 | 5.32 | 1.39  | 1.102 | 0.26 | 0.29 | 99.06  |
| 1- $\sigma$ |          | 0.30  | 0.09 | 0.12  | 0.063 | 0.04 | 0.03 | 0.32   |
| X63         | 10       | 92.85 | 5.50 | 2.06  | 1.16  | 0.43 | 0.11 | 102.11 |
| 1- $\sigma$ |          | 0.22  | 0.05 | 0.08  | 0.06  | 0.02 | 0.04 | 0.25   |
| G634        | 10       | 91.60 | 5.42 | 2.07  | 1.23  | 0.45 | 0.15 | 100.93 |
| 1- $\sigma$ |          | 0.61  | 0.16 | 0.01  | 0.04  | 0.15 | 0.02 | 0.87   |
| X74         | 10       | 92.33 | 4.62 | 0.48  | 1.36  | 0.44 | 0.06 | 99.28  |
| 1- $\sigma$ |          | 0.39  | 0.13 | 0.29  | 0.11  | 0.03 | 0.04 | 0.40   |
| G639        | 10       | 92.33 | 5.03 | 1.51  | 1.26  | 0.61 | 0.13 | 100.87 |
| 1- $\sigma$ |          | 0.43  | 0.12 | 0.01  | 0.08  | 0.04 | 0.02 | 0.41   |
| G603        | 20       | 88.68 | 5.95 | 0.39  | 2.288 | 0.42 | 0.30 | 98.03  |
| 1- $\sigma$ |          | 0.47  | 0.09 | 0.06  | 0.117 | 0.05 | 0.02 | 0.43   |
| X29         | 20       | 89.91 | 6.04 | 0.50  | 2.070 | 0.26 | 0.19 | 98.98  |
| 1- $\sigma$ |          | 0.69  | 0.07 | 0.05  | 0.143 | 0.04 | 0.04 | 0.67   |
| X25         | 20       | 88.72 | 6.05 | 0.61  | 1.888 | 0.26 | 0.42 | 97.96  |
| 1- $\sigma$ |          | 0.40  | 0.11 | 0.09  | 0.091 | 0.03 | 0.11 | 0.37   |
| G620        | 20       | 89.03 | 4.91 | 0.01  | 2.879 | 0.68 | 0.13 | 97.64  |
| 1- $\sigma$ |          | 0.28  | 0.26 | 0.01  | 0.041 | 0.04 | 0.09 | 0.31   |
| X50         | 20       | 89.95 | 4.61 | 0.02  | 2.924 | 0.41 | 0.20 | 98.11  |
| 1- $\sigma$ |          | 0.43  | 0.12 | 0.02  | 0.057 | 0.03 | 0.05 | 0.41   |
| G621        | 20       | 90.00 | 4.70 | 0.04  | 2.526 | 0.80 | 0.87 | 98.94  |
| 1- $\sigma$ |          | 0.58  | 0.09 | 0.01  | 0.124 | 0.05 | 0.04 | 0.49   |
| X47         | 18       | 88.60 | 4.59 | 0.00  | 3.827 | 0.42 | 0.27 | 97.72  |
| 1- $\sigma$ |          | 0.39  | 0.13 | 0.00  | 0.055 | 0.06 | 0.04 | 0.31   |
| G623        | 20       | 87.69 | 5.94 | 0.00  | 3.191 | 0.29 | 0.19 | 97.31  |
| 1- $\sigma$ |          | 0.42  | 0.17 | 0.00  | 0.068 | 0.11 | 0.04 | 0.35   |
| X48         | 20       | 89.11 | 4.73 | 0.00  | 3.495 | 0.11 | 0.21 | 97.65  |
| 1- $\sigma$ |          | 0.52  | 0.19 | 0.01  | 0.069 | 0.02 | 0.05 | 0.44   |

*n* represents the number of obtained measurements that were averaged for the reported data

**Supplementary Table 5. Coefficients of regression for  $D_N^{\text{alloy/silicate}}$  parameterization**

| <b>Parameters</b> | <b>Coefficients</b> | <b>1-<math>\sigma</math></b> |
|-------------------|---------------------|------------------------------|
| <i>a</i>          | 7775.00             | 5227.37                      |
| <i>b</i>          | 9325.77             | 2602.79                      |
| <i>c</i>          | 343.55              | 159.81                       |
| <i>d</i>          | -37.66              | 17.91                        |
| <i>e</i>          | -0.11               | 0.05                         |
| <i>f</i>          | -3790.92            | 2313.83                      |
| <i>g</i>          | 419.53              | 253.26                       |
| <i>h</i>          | 0.69                | 0.35                         |
| <i>i</i>          | 1.43                | 0.17                         |

**Supplementary Table 6. Oxygen fugacity of core-mantle differentiation of rocky bodies**

| <b>Rocky body</b>   | <b><math>f_{O_2}</math> (IW)</b> | <b>Methodology</b>                                                                                      | <b>Reference</b>     |
|---------------------|----------------------------------|---------------------------------------------------------------------------------------------------------|----------------------|
| Mercury             | IW-7 to IW-5                     | MESSENGER data + melting experiments                                                                    | Refs. <sup>1,2</sup> |
| Aubrite parent body | IW-7 to IW-5                     | Depletion of moderately siderophile elements in aubrites                                                | Ref. <sup>3</sup>    |
| IAB-MG, IIE irons   | IW-4 to IW-2                     | Metal-olivine-orthopyroxene equilibria                                                                  | Ref. <sup>4</sup>    |
| Ureilites           | IW-3 to IW-1                     | Cr valencies in ureilite olivine                                                                        | Ref. <sup>5</sup>    |
| Earth               | IW-5 to IW-2                     | Oxidation of Earth's primitive upper mantle +<br>Depletion of moderately siderophile elements in mantle | Ref. <sup>6,7</sup>  |
| Mars                | IW-2 to IW-1                     | Depletion of moderately siderophile elements in SNCs                                                    | Ref. <sup>8</sup>    |
| Vesta               | IW-2 to IW-1                     | Depletion of moderately siderophile elements in HEDs                                                    | Ref. <sup>9</sup>    |
| Venus               | IW-2 to IW (?)                   | Core and mantle compositions along a distance vector from Mercury to Earth                              | Ref. <sup>10</sup>   |
| Angrite parent body | IW-2 to IW-1                     | Depletion of moderately siderophile elements in angrites                                                | Ref. <sup>11</sup>   |

**Supplementary Table 7. Physical parameters of rocky bodies**

| <b>Rocky body</b>   | <b>Surface area (km<sup>2</sup>)</b> | <b>Mass (kg)</b> | <b>g (ms<sup>-2</sup>)</b> |
|---------------------|--------------------------------------|------------------|----------------------------|
| <b>Vesta</b>        | 8.00E+05                             | 2.60E+20         | 0.22                       |
| <b>Intermediate</b> | 7.13E+06                             | 5.97E+21         | 0.70                       |
| <b>Moon</b>         | 3.80E+07                             | 7.35E+22         | 1.62                       |
| <b>Mars</b>         | 1.45E+08                             | 6.39E+23         | 3.71                       |
| <b>Earth</b>        | 5.10E+08                             | 5.97E+24         | 9.81                       |

Data for Solar System bodies is compiled from  
[https://nssdc.gsfc.nasa.gov/planetary/factsheet/planet\\_table\\_ratio.html](https://nssdc.gsfc.nasa.gov/planetary/factsheet/planet_table_ratio.html)

## Supplementary References

1. Nittler, L. R., Chabot, N. L., Grove, T. L. & Peplowski, P. N. The Chemical Composition of Mercury. in *Mercury The View after MESSENGER* (ed. Sean C. Solomon , Larry R. Nittler, B. J. A.) 30–51 (Cambridge University Press, 2019).
2. Namur, O., Charlier, B., Holtz, F., Cartier, C. & McCammon, C. Sulfur solubility in reduced mafic silicate melts: Implications for the speciation and distribution of sulfur on Mercury. *Earth Planet. Sci. Lett.* (2016). doi:10.1016/j.epsl.2016.05.024
3. Casanova, I., Keil, K. & Newsom, H. E. Composition of metal in aubrites: Constraints on core formation. *Geochim. Cosmochim. Acta* **57**, 675–682 (1993).
4. Righter, K. & Drake, M. J. Core Formation in Earth’s Moon, Mars, and Vesta. *Icarus* **124**, 513–529 (1996).
5. Goodrich, C. A., Sutton, S. R., Wirick, S. & Jercinovic, M. J. Chromium valences in ureilite olivine and implications for ureilite petrogenesis. *Geochim. Cosmochim. Acta* **122**, 280–305 (2013).
6. Wade, J. & Wood, B. J. Core formation and the oxidation state of the Earth. *Earth Planet. Sci. Lett.* **236**, 78–95 (2005).
7. Rubie, D. C. *et al.* Accretion and differentiation of the terrestrial planets with implications for the compositions of early-formed Solar System bodies and accretion of water. *Icarus* **248**, 89–108 (2015).
8. Rai, N. & Van Westrenen, W. Core-mantle differentiation in Mars. *J. Geophys. Res. E Planets* **118**, 1195–1203 (2013).
9. Steenstra, E. S., Knibbe, J. S., Rai, N. & van Westrenen, W. Constraints on core formation in Vesta from metal–silicate partitioning of siderophile elements. *Geochim. Cosmochim. Acta* **177**, 48–61 (2016).
10. Trønnes, R. G. *et al.* Core formation, mantle differentiation and core-mantle interaction within Earth and the terrestrial planets. *Tectonophysics* **760**, 165–198 (2019).
11. Steenstra, E. S. *et al.* The effect of melt composition on metal-silicate partitioning of siderophile elements and constraints on core formation in the angrite parent body. *Geochim. Cosmochim. Acta* **212**, 62–83 (2017).
